# Supplementary material for: Construction of relatedness matrices using genotyping-by-sequencing data
Source: PubMed Central journal article supplement (PMC4675043; doi:10.1186/s12864-015-2252-3), 2015-12-09
Supplement: 12864_2015_2252_MOESM1_ESM.pdf [file 12864_2015_2252_MOESM1_ESM.pdf]

**Additional file 1.** Further details of calculations of expected values of relevant functions of genotype scores.

$$\begin{aligned}
E(x_i) &= 2P(AA_i^*) + P(AB_i^*) \\
&= 2p^2 + 2p(1-p)F_i + 4p(1-p)(1-F_i)K_i + 2p(1-p)(1-F_i)(1-2K_i) \\
&= 2p^2 + 2p(1-p)[F_i + 2(1-F_i)K_i + (1-F_i)(1-2K_i)] \\
&= 2p^2 + 2p(1-p)[F_i + 2K_i - 2F_iK_i + 1 - F_i - 2K_i + 2F_iK_i] \\
&= 2p^2 + 2p(1-p) \\
&= 2p(p+1-p) \\
&= 2p \\
E(x_i^2) &= 4P(AA_i^*) + P(AB_i^*) \\
&= 4p^2 + 4p(1-p)F_i + 8p(1-p)(1-F_i)K_i + 2p(1-p)(1-F_i)(1-2K_i) \\
&= 4p^2 + 2p(1-p)[2F_i + 4(1-F_i)K_i + (1-F_i)(1-2K_i)] \\
&= 4p^2 + 2p(1-p)[2F_i + 4K_i - 4F_iK_i + 1 - F_i - 2K_i + 2F_iK_i] \\
&= 4p^2 + 2p(1-p)(1 + F_i + 2K_i - 2F_iK_i) \\
E(x_i x_{i'}) &= 4P(AA_i^*, AA_{i'}^*) + 2P(AA_i^*, AB_{i'}^*) + 2P(AB_i^*, AA_{i'}^*) + P(AB_i^*, AB_{i'}^*) \\
&= 4P(AA_i, AA_{i'}) + 2P(AA_i, AB_{i'}) (2K_{i'} + 1 - 2K_{i'}) + 2P(AB_i, AB_{i'}) \\
&\quad + P(AB_i, AB_{i'}) (4K_i K_{i'} + 2K_i(1 - 2K_{i'}) + 2K_{i'}(1 - 2K_i) + (1 - 2K_i)(1 - 2K_{i'})) \\
&= 4P(AA_i, AA_{i'}) + 4P(AA_i, AB_{i'}) + P(AB_i, AB_{i'}) \\
&= 4p(1-p)(1 - 6p + 6p^2)\delta + 12p^2(1-p)^2\Delta + 16p^2(1-p)(1-2p)\gamma \\
&\quad + 24p^3(1-p)\theta + 4p^4 + 8p(1-p)[-(1 - 6p + 6p^2)\delta - 3p(1-p)\Delta + (1 - 2p)(1 - 4p)\gamma + 3p(1-2p)\theta + p^2] + 4p(1-p)[(1 - 6p + 6p^2)\delta + 3p(1-p)\Delta - 2(1-2p)^2\gamma + (1 - 6p + 6p^2)\theta + p(1-p)] \\
&= 4p(1-p)(1 - 6p + 6p^2)\delta + 12p^2(1-p)^2\Delta + 16p^2(1-p)(1-2p)\gamma \\
&\quad + 24p^3(1-p)\theta + 4p^4 + [-8p(1-p)(1 - 6p + 6p^2)\delta - 24p^2(1-p)^2\Delta + 8p(1-p)(1-2p)(1-4p)\gamma + 24p^2(1-p)(1-2p)\theta + 8(1-p)p^3] \\
&\quad + [4p(1-p)(1 - 6p + 6p^2)\delta + 12p^2(1-p)^2\Delta - 8p(1-p)(1-2p)^2\gamma + 4p(1-p)(1 - 6p + 6p^2)\theta + 4p^2(1-p)^2] \\
&= 4[1 - 2 + 1]p(1-p)(1 - 6p + 6p^2)\delta + 12[1 - 2 + 1]p^2(1-p)^2\Delta + 8[2p + (1 - 4p) - (1 - 2p)]p(1-p)(1 - 2p)\gamma + 4[6p^2 + 6p(1 - 2p) + (1 - 6p + 6p^2)]p(1-p)\theta + 4(p^2 + 2(1-p)p + (1-p)^2)p^2 \\
&= 4[6p^2 - 12p^2 + 1 + 6p^2]p(1-p)\theta + 4(p^2 + 2p - 2p^2 + 1 - 2p + p^2)p^2 \\
&= 4p(1-p)\theta + 4p^2 \\
E(S_{ii}) &= E(x_i^2) - 4pE(x_i) + 4p^2 \\
&= 4p^2 + 2p(1-p)(1 + F_i + 2K_i - 2F_iK_i) - 8p^2 + 4p^2 \\
&= 2p(1-p)(1 + F_i + 2K_i - 2F_iK_i) \\
E(S_{ii'}) &= E(x_i x_{i'}) - 4pE(x_i) + 4p^2 \\
&= E(x_i x_{i'}) - 4p^2 \\
&= 4p(1-p)\theta_{ii'}
\end{aligned}$$
